# Supplementary material
Source: PubMed Central journal article supplement (PMC3462556)
Supplement: supp_74.18.1434_Burns_74_1434.pdf [file supp_74.18.1434_Burns_74_1434.pdf]

## 중증근무력증의 composite

중증근무력증에 대한 타당하고 신뢰성 있는 예후 측정

### The MG Composite

A valid and reliable outcome measure for myasthenia gravis

Ted M. Burns, MD  
Mark Conway, PhD  
Donald B. Sanders, MD  
On behalf of the MG  
Composite and  
MG-QOL15 Study Group

**목적 :** 중증근무력증(myasthenia gravis, MG) 예후 측정의 임상 적용에 대한 동시 타당도(concurrent validity), 구성 타당도(construct validity)와 검사-재검사 신뢰도(test-retest reliability)를 연구하고자 한다.

**방법 :** Myasthenia Gravis Composite (MGC) 척도에 대한 타당도 연구에 11개 센터가 참가하였다. MG 환자는 2번의 연속 방문을 통해 검사를 시행하였다. MGC의 동시, 구성 타당도는 MG의 다른 예후 측정법에 따라 MGC 점수를 매겨 평가하였다. 임상적인 개선 여부를 알아내는 MGC 척도의 민감도와 특이도를 평가하기 위해 임상적 개선을 나타낼 만한 많은 지표들을 사용하였다. 검사-재검사 신뢰도는 Virginia 대학에서 시행하였다.

**결과 :** 2008년 7월 1일~2009년 1월 31일, MG 환자 총 175명이 11개 센터에서 등록되었다. 이 중 151명을 추적 관찰하였다. 총 MGC 점수는 다른 MG 척도와 탁월한 동시 타당도를 보였다. MGC의 민감도와 특이도에 대한 분석 결과, 총 MGC 점수의 3점 상승이 임상적인 개선을 의미하였다. 뿐만 아니라 MGC 점수의 3점 향상은 15-item myasthenia gravis quality of life scale (MG-QOL15) 점수가 향상된 것과 마찬가지로, 대부분의 환자들에서 의미 있는 임상적 개선이 있음을 의미한다. 이 점수는 정신측정학(psychometric) 특성 측면에서 볼 때 가장 중요하게 치료하여야 할 2가지의 기능적 영역으로 구성된 개별화된 하위 점수보다 다들 바 없었다. MGC의 검사-재검사 신뢰도 계수(coefficient)는 98%로 탁월한 검사-재검사 신뢰도를 나타내었다.

**결론 :** Myasthenia Gravis Composite는 임상시험에서 중증근무력증 환자들의 임상 상태를 측정하는 신뢰성 있고 타당한 검사 도구이다.

Neurology® 2010;74:1434-1440

| Item                                                                 | 0                | 1                                                  | 2                                                                   | 3                                                |
|----------------------------------------------------------------------|------------------|----------------------------------------------------|---------------------------------------------------------------------|--------------------------------------------------|
| Ptosis, upward gaze (physician examination)                          | >45 seconds = 0  | 11-45 seconds = 1                                  | 1-10 seconds = 2                                                    | Immediate = 3                                    |
| Double vision on lateral gaze, left or right (physician examination) | > 45 seconds = 0 | 11-45 seconds = 1                                  | 1-10 seconds = 3                                                    | Immediate = 4                                    |
| Eye closure (physician examination)                                  | Normal = 0       | Mild weakness (can be forced open with effort) = 0 | Moderate weakness (can be forced open easily) = 1                   | Severe weakness (unable to keep eyes closed) = 2 |
| Talking (patient history)                                            | Normal = 0       | Intermittent slurring or nasal speech = 2          | Constant slurring or nasal but can be understood = 4                | Difficult to understand speech = 6               |
| Chewing (patient history)                                            | Normal = 0       | Fatigue with solid food = 2                        | Fatigue with soft food = 4                                          | Gastric tube = 6                                 |
| Swallowing (patient history)                                         | Normal = 0       | Rare episode of choking or trouble swallowing = 2  | Frequent trouble swallowing, e.g. necessitating changes in diet = 5 | Gastric tube = 6                                 |
| Breathing (thought to be caused by MG)                               | Normal = 0       | Shortness of breath with exertion = 2              | Shortness of breath at rest = 4                                     | Ventilator dependence = 9                        |
| Neck flexion or extension (weakest) (physician examination)          | Normal = 0       | Mild weakness = 1                                  | Moderate weakness (i.e., ~50% weak, ±15%) = 3*                      | Severe weakness = 4                              |
| Shoulder abduction (physician examination)                           | Normal = 0       | Mild weakness = 2                                  | Moderate weakness (i.e., ~50% weak, ±15%) = 4*                      | Severe weakness = 5                              |
| Hip flexion (physician examination)                                  | Normal = 0       | Mild weakness = 2                                  | Moderate weakness (i.e., ~50% weak, ±15%) = 4*                      | Severe weakness = 5                              |

\*Moderate weakness for neck and limb items should be construed as weakness that equals roughly 50% ±15% of expected normal strength. Any weakness milder than that would be mild and any weakness more severe than that would be classified as severe.
